# Supplementary material for: The Human Cytomegalovirus Nonstructural Glycoprotein UL148 Reorganizes the Endoplasmic Reticulum
Source: PubMed Central journal article supplement (PMC6904874; doi:10.1128/mbio.02110-19), 2019-12-10

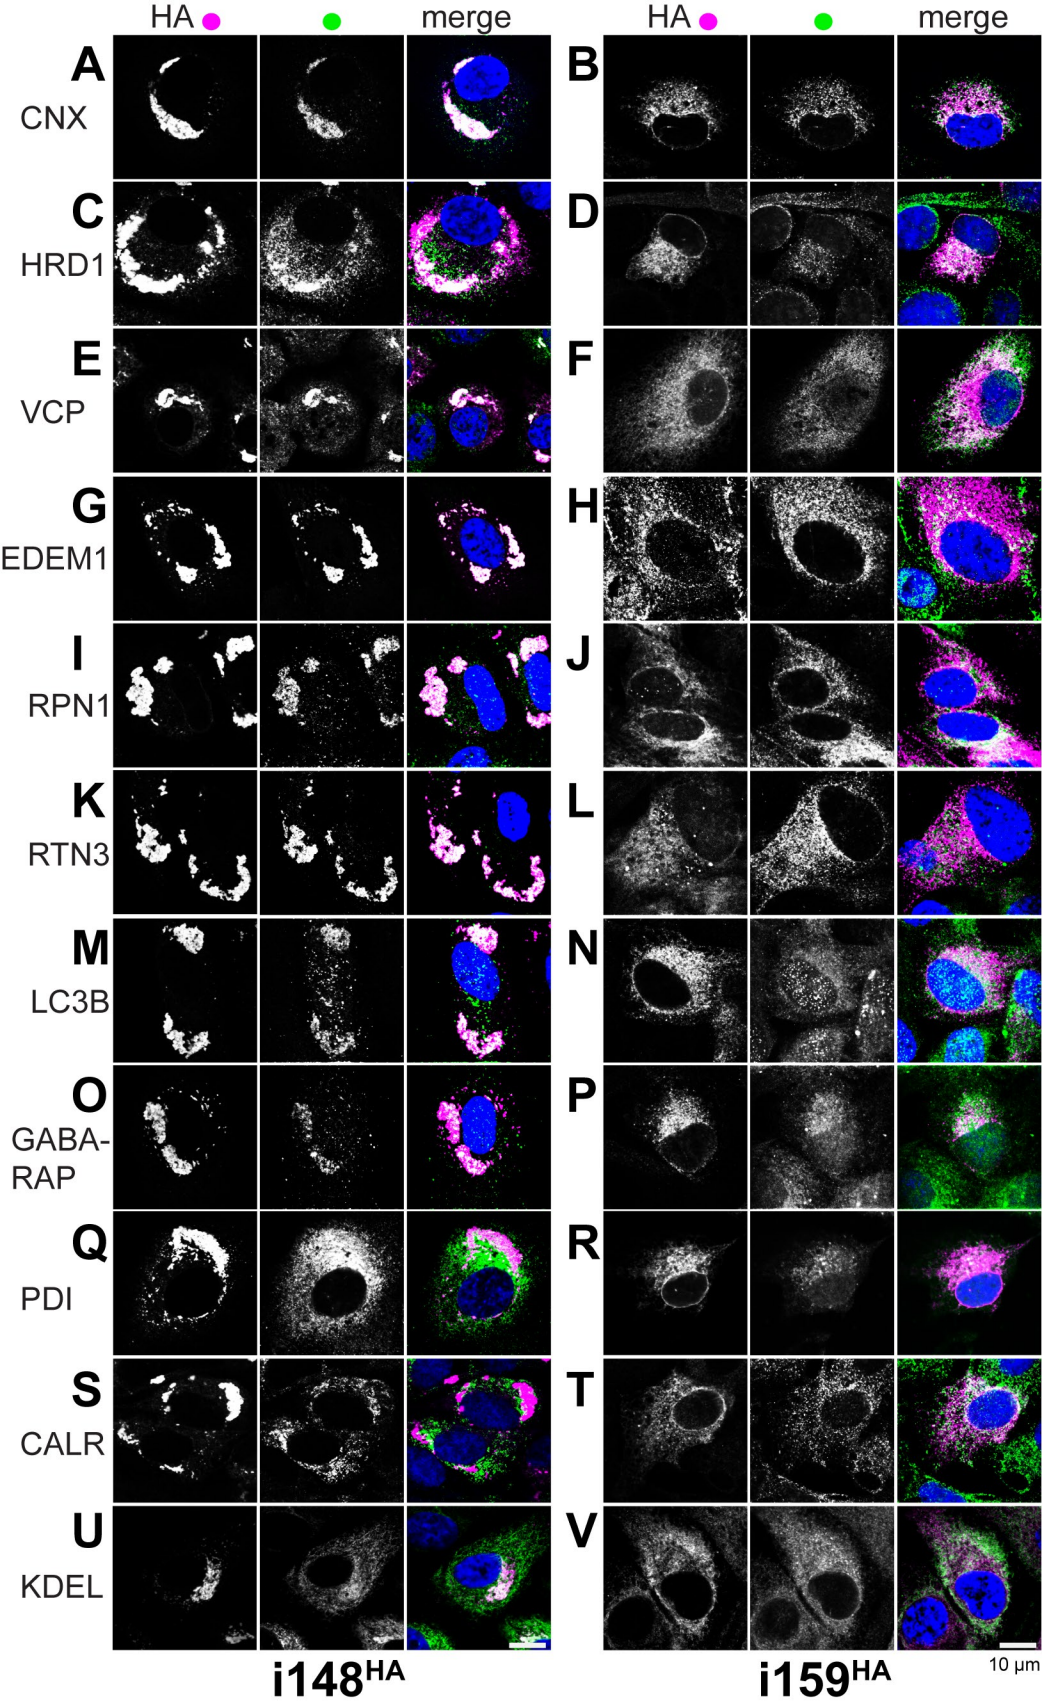

Supplement: mBio.02110-19-sf003.pdf [file mBio.02110-19-sf003.pdf]
